# Supplementary material for: Evolutionary Analysis of Structural Protein Gene VP1 of Foot‐and‐Mouth Disease Virus Serotype Asia 1
Source: Hindawi journal article supplement (doi:10.1155/2015/734253), 2015-01-01
Supplement: f1 [file 734253.f1.pdf]

**Supplementary Table** History of the FMDV serotype Asia1 field isolates used in the study.

|    | Virus Isolate       | Place of Isolation | Data of collection | Species | Reference              | Accession No |
|----|---------------------|--------------------|--------------------|---------|------------------------|--------------|
| 1  | AFG/116/2004        | Afghanistan        | 2004               | Bovine  | Schumann et al., 2008  | EF457993     |
| 2  | AFG/138/2004        | Afghanistan        | 2004               | Bovine  | Schumann et al., 2008  | EF457994     |
| 3  | AFG/22/2003         | Afghanistan        | 2003               | Bovine  | Schumann et al., 2008  | EF457987     |
| 4  | AFG/24/2003         | Afghanistan        | 2003               | Bovine  | Schumann et al., 2008  | EF457988     |
| 5  | AFG/26/2003         | Afghanistan        | 2003               | Bovine  | Schumann et al., 2008  | EF457989     |
| 6  | AFG/33/2003         | Afghanistan        | 2003               | Bovine  | Schumann et al., 2008  | EF457990     |
| 7  | AFG/40/2003         | Afghanistan        | 2003               | Bovine  | Schumann et al., 2008  | EF457991     |
| 8  | AFG/44/2003         | Afghanistan        | 2003               | Bovine  | Schumann et al., 2008  | EF457992     |
| 9  | Amursky/Russia/2005 | Russia             | 2005               | NK      | Valarcher et al., 2005 | DQ121401     |
| 10 | BAM/AFG/L1/2009     | Afghanistan        | 2009               | Cattle  | Jamal et al., 2011     | HQ439194     |
| 11 | BAM/AFG/L2/2009     | Afghanistan        | 2009               | Cattle  | Jamal et al., 2011     | HQ439195     |
| 12 | BAM/AFG/L2823/2009  | Afghanistan        | 2009               | Cattle  | Jamal et al., 2011     | HQ439203     |

|    |                        |                 |      |        |                           |          |
|----|------------------------|-----------------|------|--------|---------------------------|----------|
| 13 | BAM/AFG/L282<br>4/2009 | Afghanista<br>n | 2009 | Cattle | Jamal et al,. 2011        | HQ439204 |
| 14 | BAM/AFG/L282<br>5/2009 | Afghanista<br>n | 2009 | Cattle | Jamal et al,. 2011        | HQ439205 |
| 15 | BAM/AFG/L3/2<br>009    | Afghanista<br>n | 2009 | Cattle | Jamal et al,. 2011        | HQ439196 |
| 16 | BAM/AFG/L-59<br>0/2009 | Afghanista<br>n | 2009 | NK     | Belsham et al,. 2011      | HQ113233 |
| 17 | BAM/AFG/L591<br>/2009  | Afghanista<br>n | 2009 | NK     | Jamal et al,. 2011        | HQ439199 |
| 18 | BAM/AFG/L638<br>/2009  | Afghanista<br>n | 2009 | Cattle | Jamal et al,. 2011        | HQ439197 |
| 19 | BAM/AFG/L639<br>/2009  | Afghanista<br>n | 2009 | Cattle | Jamal et al,. 2011        | HQ439198 |
| 20 | BAM/AFG/L640<br>/2009  | Afghanista<br>n | 2009 | Cattle | Jamal et al,. 2011        | HQ439200 |
| 21 | BAM/AFG/L641<br>/2009  | Afghanista<br>n | 2009 | Cattle | Jamal et al,. 2011        | HQ439201 |
| 22 | BeiJing/CHA/20<br>05   | China           | 2005 | Bovine | Valarcher et al,. 2009    | EF185303 |
| 23 | BR/Myanmar/1<br>/06    | China           | 2006 | Bovine | Zhang et al., unpub. data | EU091342 |
| 24 | BR/Myanmar/2<br>/06    | China           | 2006 | Bovine | Zhang et al., unpub. data | EU091343 |
| 25 | BR/Myanmar/3<br>/06    | China           | 2006 | Bovine | Zhang et al., unpub. data | EU091344 |
| 26 | BR/Myanmar/4<br>/06    | China           | 2006 | Bovine | Zhang et al., unpub. data | EU091345 |
| 27 | BR/Myanmar/5<br>/06    | China           | 2006 | Bovine | Zhang et al., unpub. data | EU091346 |

|    |                 |          |      |        |                           |          |
|----|-----------------|----------|------|--------|---------------------------|----------|
| 28 | BR/Myanmar/6/06 | China    | 2006 | Bovine | Zhang et al., unpub. data | EU091347 |
| 29 | BR/Myanmar/7/06 | China    | 2006 | Bovine | Zhang et al., unpub. data | EU091348 |
| 30 | GanSu/CHA/2005  | China    | 2005 | Bovine | Valarcher et al., 2009    | EF185304 |
| 31 | HeB/CHA/1/2005  | China    | 2005 | Bovine | Valarcher et al., 2009    | EF187274 |
| 32 | HeB/CHA/2/2005  | China    | 2005 | Bovine | Valarcher et al., 2009    | EF187273 |
| 33 | HKN/1/2005      | Hongkong | 2005 | Cattle | Valarcher et al., 2005    | DQ121114 |
| 34 | HKN/2/2005      | Hongkong | 2005 | Cattle | Valarcher et al., 2005    | DQ121115 |
| 35 | HKN/3/2005      | Hongkong | 2005 | Cattle | Valarcher et al., 2009    | FJ785235 |
| 36 | HKN/4/2005      | Hongkong | 2005 | Cattle | Valarcher et al., 2009    | FJ785236 |
| 37 | HKN/5/2005      | Hongkong | 2005 | Cattle | Valarcher et al., 2009    | FJ785237 |
| 38 | HKN/6/2005      | Hongkong | 2005 | Cattle | Valarcher et al., 2009    | FJ785238 |
| 39 | HKN/7/2005      | Hongkong | 2005 | Cattle | Valarcher et al., 2009    | FJ785239 |
| 40 | HKN/8/2005      | Hongkong | 2005 | Cattle | Valarcher et al., 2009    | FJ785240 |
| 41 | IND/12/2007     | India    | 2007 | Bovine | Sanyal et al., 2010       | HQ224553 |
| 42 | IND/121/2007    | India    | 2007 | Bovine | Sanyal et al., 2010       | HQ224554 |
| 43 | IND/137/2008    | India    | 2008 | Bovine | Sanyal et al., 2010       | HQ224561 |
| 44 | IND/227/2007    | India    | 2007 | Bovine | Sanyal et al., 2010       | HQ224555 |
| 45 | IND/32/2008     | India    | 2007 | Bovine | Sanyal et al., 2010       | HQ224556 |
| 46 | IND/93/2008     | India    | 2007 | Bovine | Sanyal et al., 2010       | HQ224557 |
| 47 | IND/95/2008     | India    | 2007 | Bovine | Sanyal et al., 2010       | HQ224558 |
| 48 | IND/96/2008     | India    | 2007 | Bovine | Sanyal et al., 2010       | HQ224559 |

|    |              |       |      |         |                         |          |
|----|--------------|-------|------|---------|-------------------------|----------|
| 48 | IND/97/2008  | India | 2007 | Bovine  | Sanyal et al.,2010      | HQ224560 |
| 50 | IND/147/2004 | India | 2003 | Bovine  | Valarcher et al., 2009  | FJ785294 |
| 51 | IND/150/2004 | India | 2003 | Bovine  | Valarcher et al., 2009  | FJ785295 |
| 52 | IND/153/2004 | India | 2003 | Bovine  | Valarcher et al., 2009  | FJ785296 |
| 53 | IND/156/2004 | India | 2003 | Bovine  | Valarcher et al., 2009  | FJ785297 |
| 54 | IND/158/2004 | India | 2003 | Bovine  | Valarcher et al., 2009  | FJ785298 |
| 55 | IND/168/2004 | India | 2004 | Bovine  | Valarcher et al., 2009  | FJ785299 |
| 56 | IND/322/2004 | India | 2004 | Bovine  | Valarcher et al., 2009  | FJ785300 |
| 57 | IND/325/2004 | India | 2004 | Bovine  | Valarcher et al., 2009  | FJ785301 |
| 58 | IND/327/2004 | India | 2004 | Bovine  | Valarcher et al., 2009  | FJ785302 |
| 58 | IND/328/2004 | India | 2004 | Bovine  | Valarcher et al., 2009  | FJ785303 |
| 60 | IND/389/2004 | India | 2004 | Bovine  | Valarcher et al., 2009  | FJ785304 |
| 61 | IND/4/2004   | India | 2003 | NK      | Valarcher et al., 2009  | FJ785293 |
| 62 | IND/763/2003 | India | 2003 | Bovine  | Valarcher et al., 2005  | FJ785292 |
| 63 | IND/114/2012 | India | 2012 | Cattle  | Subramaniam et al.,2013 | KF570668 |
| 64 | IND/114/2004 | India | 2004 | Bovine  | Valarcher et al., 2005  | DQ101239 |
| 65 | IND/115/2012 | India | 2012 | Buffalo | Subramaniam et al.,2013 | KF570669 |
| 66 | IND/118/2012 | India | 2012 | Cattle  | Subramaniam et al.,2013 | KF570670 |
| 67 | IND/119/2012 | India | 2012 | Cattle  | Subramaniam et al.,2013 | KF570671 |
| 68 | IND/120/2012 | India | 2012 | Buffalo | Subramaniam et al.,2013 | KF570672 |
| 69 | IND/121/2012 | India | 2012 | Cattle  | Subramaniam et al.,2013 | KF570673 |
| 70 | IND/125/2011 | India | 2011 | Cattle  | Subramaniam et al.,2013 | KF570661 |
| 71 | IND/127/2011 | India | 2011 | Cattle  | Subramaniam et al.,2013 | KF570662 |
| 72 | IND/129/2011 | India | 2011 | Cattle  | Subramaniam et al.,2013 | KF570663 |

|    |              |       |      |        |                         |          |
|----|--------------|-------|------|--------|-------------------------|----------|
| 73 | IND/133/2011 | India | 2011 | Cattle | Subramaniam et al.,2013 | KF570664 |
| 74 | IND/135/2012 | India | 2012 | Cattle | Subramaniam et al.,2013 | KF570674 |
| 75 | IND/148/2011 | India | 2011 | Cattle | Subramaniam et al.,2013 | KF570665 |
| 76 | IND/16/2012  | India | 2011 | Cattle | Subramaniam et al.,2013 | KF570666 |
| 77 | IND/165/2004 | India | 2004 | Bovine | Valarcher et al., 2005  | DQ101238 |
| 78 | IND/175/2004 | India | 2004 | Bovine | Valarcher et al., 2005  | DQ101237 |
| 79 | IND/205/2010 | India | 2010 | Cattle | Subramaniam et al.,2013 | KF570658 |
| 80 | IND/248/2009 | India | 2009 | Cattle | Subramaniam et al.,2013 | KF570654 |
| 81 | IND/268/2004 | India | 2004 | Bovine | Valarcher et al., 2005  | DQ101236 |
| 82 | IND/283/2012 | India | 2012 | Cattle | Subramaniam et al.,2013 | KF570675 |
| 83 | IND/285/2012 | India | 2012 | Cattle | Subramaniam et al.,2013 | KF570676 |
| 84 | IND/288/2012 | India | 2012 | Cattle | Subramaniam et al.,2013 | KF570677 |
| 85 | IND/291/2012 | India | 2012 | Cattle | Subramaniam et al.,2013 | KF570678 |
| 86 | IND/292/2012 | India | 2011 | Cattle | Subramaniam et al.,2013 | KF570679 |
| 87 | IND/294/2012 | India | 2012 | Cattle | Subramaniam et al.,2013 | KF570680 |
| 88 | IND/300/2012 | India | 2012 | Cattle | Subramaniam et al.,2013 | KF570681 |
| 89 | IND/303/2012 | India | 2012 | Cattle | Subramaniam et al.,2013 | KF570682 |
| 90 | IND/305/2012 | India | 2012 | Cattle | Subramaniam et al.,2013 | KF570683 |
| 91 | IND/306/2012 | India | 2012 | Cattle | Subramaniam et al.,2013 | KF570684 |
| 92 | IND/327/2009 | India | 2009 | Cattle | Subramaniam et al.,2013 | KF570655 |
| 93 | IND/341/2008 | India | 2008 | Cattle | Subramaniam et al.,2013 | KF570653 |
| 94 | IND/388/2004 | India | 2004 | Bovine | Valarcher et al., 2005  | DQ101235 |
| 95 | IND/65/2010  | India | 2010 | Cattle | Subramaniam et al.,2013 | KF570657 |
| 96 | IND/673/2003 | India | 2003 | Bovine | Valarcher et al., 2009  | DQ101241 |

|     |                         |                 |      |         |                         |          |
|-----|-------------------------|-----------------|------|---------|-------------------------|----------|
| 97  | IND/7/2011              | India           | 2010 | Cattle  | Subramaniam et al.,2013 | KF570659 |
| 98  | IND/762/2003            | India           | 2003 | Bovine  | Valarcher et al., 2009  | DQ101240 |
| 99  | IND/78/2011             | India           | 2011 | Cattle  | Subramaniam et al.,2013 | KF570660 |
| 100 | IND/787/2009            | India           | 2009 | Cattle  | Subramaniam et al.,2013 | KF570656 |
| 101 | IRN/10/2004             | Iran            | 2004 | Bovine  | Valarcher et al., 2005  | DQ121119 |
| 102 | IRN/25/2004             | Iran            | 2004 | Bovine  | Valarcher et al., 2005  | DQ121120 |
| 103 | IRN/30/2004             | Iran            | 2004 | NK      | Valarcher et al., 2009  | FJ785246 |
| 104 | IRN/31/2004             | Iran            | 2004 | NK      | Valarcher et al., 2005  | DQ121121 |
| 105 | JiangSu/CHA/1/<br>2005  | China           | 2005 | Bovine  | Valarcher et al., 2009  | EF149009 |
| 106 | JiangSu/CHA/2/<br>2005  | China           | 2005 | Bovine  | Valarcher et al., 2005  | DQ156527 |
| 107 | KAB/AFG/L642/<br>2009   | Afghanista<br>n | 2009 | Cattle  | Jamal et al., 2011      | HQ439202 |
| 108 | Khabarovsk/RU<br>S/2005 | Russia          | 2005 | Bovine  | Valarcher et al., 2009  | FJ785267 |
| 109 | KRG/1/2004*             | Kyrgyzstan      | 2004 | NK      | Valarcher et al., 2009  | FJ785248 |
| 110 | KRG/1/2004              | Kyrgyzstan      | 2004 | NK      | Valarcher et al., 2009  | FJ785247 |
| 111 | KRG/2/2004              | Kyrgyzstan      | 2004 | NK      | Valarcher et al., 2009  | FJ785249 |
| 112 | MOG/05                  | Mongolia        | 2005 | Cattle  | Lee et al., 2009        | EF614458 |
| 113 | MOG/2005                | Mongolia        | 2005 | Bovine  | Valarcher et al., 2009  | FJ785252 |
| 114 | MYA/1/05                | Myanmar         | 2005 | NK      | Valarcher et al., 2009  | FJ785257 |
| 115 | MYA/1/2005              | Myanmar         | 2005 | NK      | Valarcher et al., 2009  | FJ785258 |
| 116 | NKR/2007                | North<br>Korea  | 2007 | Bovine  | Valarcher et al., 2009  | FJ785259 |
| 117 | PAK/1/2004              | Pakistan        | 2004 | Buffalo | Valarcher et al., 2005  | DQ121128 |

|     |                        |            |      |         |                        |          |
|-----|------------------------|------------|------|---------|------------------------|----------|
| 118 | PAK/19/2005            | Pakistan   | 2005 | Bovine  | Valarcher et al., 2009 | FJ785265 |
| 119 | PAK/2/2004             | Pakistan   | 2004 | Cattle  | Valarcher et al., 2005 | FJ785264 |
| 120 | PAK/20/2003            | Pakistan   | 2003 | NK      | Valarcher et al., 2005 | DQ121126 |
| 121 | PAK/22/2005            | Pakistan   | 2005 | Cattle  | Valarcher et al., 2009 | FJ785266 |
| 122 | PAK/69/2003            | Pakistan   | 2003 | Cattle  | Valarcher et al., 2005 | DQ121127 |
| 123 | PD 155/2010            | India      | 2010 | Cattle  | Kumar et al., 2011     | JN247565 |
| 124 | PD 18/2011             | India      | 2011 | Cattle  | Kumar et al., 2011     | JN247567 |
| 125 | PD 509/2010            | India      | 2010 | Cattle  | Kumar et al., 2011     | JN247566 |
| 126 | Prymorsky/RUS<br>/2005 | Russia     | 2005 | Bovine  | Valarcher et al., 2009 | FJ785268 |
| 127 | QH/CHA/2005            | China      | 2005 | Bovine  | Valarcher et al., 2009 | EF187272 |
| 128 | S/IRQ/2012             | Iraq       | 2012 |         |                        | JX455113 |
| 129 | SIN/PAK/L2810<br>/2009 | Pakistan   | 2009 | Buffalo | Jamal et al., 2011     | HQ439189 |
| 130 | SIN/PAK/L2811<br>/2009 | Pakistan   | 2009 | Buffalo | Jamal et al., 2011     | HQ439190 |
| 131 | SIN/PAK/L2812<br>/2009 | Pakistan   | 2009 | Buffalo | Jamal et al., 2011     | HQ439191 |
| 132 | SIN/PAK/L2952<br>/2009 | Pakistan   | 2009 | Buffalo | Jamal et al., 2011     | HQ439192 |
| 133 | SIN/PAK/L2954<br>/2009 | Pakistan   | 2009 | Buffalo | Jamal et al., 2011     | HQ439193 |
| 134 | SIN/PAK/L5/20<br>08    | Pakistan   | 2008 | Buffalo | Jamal et al., 2011     | HQ439187 |
| 135 | SIN/PAK/L8/20<br>08    | Pakistan   | 2008 | Buffalo | Jamal et al., 2011     | HQ439188 |
| 136 | TAJ/1/2003             | Tajikistan | 2003 | Bovine  | Valarcher et al., 2009 | FJ785270 |

|     |                   |            |      |         |                        |          |
|-----|-------------------|------------|------|---------|------------------------|----------|
| 137 | Taj/1/2004        | Tajikistan | 2004 | NK      | Valarcher et al., 2005 | DQ121402 |
| 138 | TAJ/2/2003        | Tajikistan | 2003 | Bovine  | Valarcher et al., 2009 | FJ785271 |
| 139 | Taj/2/2004        | Tajikistan | 2004 | NK      | Valarcher et al., 2005 | DQ121403 |
| 140 | TAJ/3/2003        | Tajikistan | 2003 | Bovine  | Valarcher et al., 2009 | FJ785272 |
| 141 | TAJ/3/2004        | Tajikistan | 2004 | NK      | Valarcher et al., 2009 | FJ785273 |
| 142 | TAJ/4/2004        | Tajikistan | 2004 | NK      | Valarcher et al., 2009 | FJ785274 |
| 143 | TAJ/5/2004        | Tajikistan | 2004 | NK      | Valarcher et al., 2009 | FJ785275 |
| 144 | TAJ/6/2004        | Tajikistan | 2004 | NK      | Valarcher et al., 2009 | FJ785276 |
| 145 | VIT 1/06          | Vietnam    | 2005 | Bovine  | Valarcher et al., 2009 | FJ785284 |
| 146 | VIT 2/06          | Vietnam    | 2005 | Bovine  | Valarcher et al., 2009 | FJ785286 |
| 147 | VIT 3/06          | Vietnam    | 2005 | Buffalo | Valarcher et al., 2009 | FJ785288 |
| 148 | VIT 4/06          | Vietnam    | 2005 | Buffalo | Valarcher et al., 2009 | FJ785290 |
| 149 | VIT/10/2006       | Vietnam    | 2005 | Buffalo | Valarcher et al., 2009 | FJ785287 |
| 150 | VIT/11/2006       | Vietnam    | 2005 | Buffalo | Valarcher et al., 2009 | FJ785289 |
| 151 | VIT/15/2005       | Vietnam    | 2005 | Bovine  | Valarcher et al., 2009 | FJ785281 |
| 152 | VIT/16/2005       | Vietnam    | 2005 | Bovine  | Valarcher et al., 2009 | FJ785282 |
| 153 | VIT/8/2006        | Vietnam    | 2005 | Bovine  | Valarcher et al., 2009 | FJ785283 |
| 154 | VIT/9/2006        | Vietnam    | 2005 | Bovine  | Valarcher et al., 2009 | FJ785285 |
| 155 | VN/LC04/2005      | Vietnam    | 2005 | Buffalo | Le et al.,2010         | GU125646 |
| 156 | VN/QT/2007        | Vietnam    | 2007 | Cattle  | Lee et al., 2011       | GQ452295 |
| 157 | VN/QT03/2007      | Vietnam    | 2007 | Cattle  | Le et al.,2010         | GU125645 |
| 158 | VN/QT466/200<br>7 | Vietnam    | 2007 | Pig     | Le et al., 2011        | GU582123 |
| 159 | VN/QT523/200<br>7 | Vietnam    | 2007 | Cattle  | Le et al., 2011        | GU582124 |



|     |            |       |      |         |                          |          |
|-----|------------|-------|------|---------|--------------------------|----------|
| 160 | WHN/CHA/06 | China | 2006 | Pig     | Yang et al., 2011        | FJ906802 |
| 161 | WNH 06     | China | 2006 | Porcine | Wang et al., unpub. data | EU887277 |

|     |                |             |      |        |                        |          |
|-----|----------------|-------------|------|--------|------------------------|----------|
| 162 | IND/2/71(1964) | India       | 1964 | Bovine | Valarcher et al., 2009 | FJ785241 |
| 163 | IND/16/76      | India       | 1976 | NK     | Valarcher et al., 2009 | FJ785242 |
| 164 | AFG/2/2001     | Afghanistan | 2001 | Bovine | Valarcher et al., 2009 | FJ785226 |
| 165 | AFG/3/2001     | Afghanistan | 2001 | Bovine | Valarcher et al., 2009 | FJ785227 |
| 166 | CAM/9/80       | Cambodia    | 1980 | NK     | Valarcher et al., 2009 | FJ785228 |
| 167 | CAM/5/97       | Cambodia    | 1997 | Bovine | Valarcher et al., 2009 | FJ785229 |
| 168 | HKN/19/74      | Hong Kong   | 1974 | Bovine | Valarcher et al., 2009 | FJ785230 |
| 169 | HKN/2/75       | Hong Kong   | 1974 | Bovine | Valarcher et al., 2009 | FJ785231 |
| 170 | HKN/24/75      | Hong Kong   | 1975 | Bovine | Valarcher et al., 2009 | FJ785232 |
| 171 | HKN/18/76      | Hong Kong   | 1976 | Bovine | Valarcher et al., 2009 | FJ785233 |
| 172 | HKN/22/80      | Hong Kong   | 1980 | Bovine | Valarcher et al., 2009 | FJ785234 |
| 173 | IND 180/02     | India       | 2002 | Bovine | Valarcher et al., 2009 | FJ785291 |
| 174 | IRN/11/2001    | Iran        | 2001 | Bovine | Valarcher et al., 2009 | FJ785243 |

|     |                    |          |      |         |                               |          |
|-----|--------------------|----------|------|---------|-------------------------------|----------|
| 175 | IRN/25/2001        | Iran     | 2001 | NK      | Valarcher et al., 2009        | FJ785244 |
| 176 | IRN/63/2001        | Iran     | 2001 | Bovine  | Valarcher et al., 2009        | FJ785245 |
| 177 | MAY/8/97           | Malaysia | 1997 | Bovine  | Valarcher et al., 2009        | FJ785250 |
| 178 | MAY/9/99           | Malaysia | 1999 | Bovine  | Valarcher et al., 2009        | FJ785251 |
| 179 | MYA/2/97           | Myanmar  | 1997 | Bovine  | Valarcher et al., 2009        | FJ785253 |
| 180 | MYA/3/2000         | Myanmar  | 2000 | Bovine  | Valarcher et al., 2009        | FJ785254 |
| 181 | MYA/4/2000         | Myanmar  | 2000 | Bovine  | Valarcher et al., 2009        | FJ785255 |
| 182 | MYA/5/2000         | Myanmar  | 2000 | Bovine  | Valarcher et al., 2009        | FJ785256 |
| 183 | PAK/1/85           | Pakistan | 1985 | Bovine  | Valarcher et al., 2009        | FJ785260 |
| 184 | PAK/3/98           | Pakistan | 1998 | Bovine  | Valarcher et al., 2009        | FJ785261 |
| 185 | PAK/33/2002        | Pakistan | 2002 | Buffalo | Valarcher et al., 2009        | FJ785262 |
| 186 | PAK/34/2002        | Pakistan | 2002 | Buffalo | Valarcher et al., 2009        | FJ785263 |
| 187 | Bangkok/60         | Thailand | 1960 | NK      | Valarcher et al., 2009        | FJ785269 |
| 188 | Tajikistan/USSR/64 | USSR     | 1964 | NK      | Valarcher et al., 2009        | FJ785278 |
| 189 | VIT/1/92           | Vietnam  | 1992 | Bovine  | Valarcher et al., 2009        | FJ785280 |
| 190 | IND_63/72          | India    | 1972 | Bovine  | Saravanan et al., unpub. data | AY304994 |
| 191 | IND 10/86          | India    | 1986 | Bovine  | Gurumurthy et al., 2002       | AF392901 |
| 192 | IND 75/86          | India    | 1986 | Bovine  | Gurumurthy et al., 2002       | AF390702 |
| 193 | IND 82/86          | India    | 1986 | Bovine  | Gurumurthy et al., 2002       | AF392914 |
| 194 | IND 46/87          | India    | 1987 | Bovine  | Gurumurthy et al., 2002       | AF390692 |
| 195 | IND 22/88          | India    | 1988 | Bovine  | Gurumurthy et al., 2002       | AF390685 |
| 196 | IND 120/88         | India    | 1988 | Bovine  | Gurumurthy et al., 2002       | AF390675 |
| 197 | IND 177/88         | India    | 1988 | Bovine  | Gurumurthy et al., 2002       | AF392904 |

|     |            |       |      |         |                         |          |
|-----|------------|-------|------|---------|-------------------------|----------|
| 198 | IND 267/88 | India | 1988 | Bovine  | Gurumurthy et al., 2002 | AF390686 |
| 199 | IND 19/89  | India | 1989 | Buffalo | Gurumurthy et al., 2002 | AF390684 |
| 200 | IND 45/89  | India | 1989 | Buffalo | Gurumurthy et al., 2002 | AF390691 |
| 201 | IND 2/90   | India | 1990 | Bovine  | Gurumurthy et al., 2002 | AF392912 |
| 202 | IND 132/90 | India | 1990 | Bovine  | Gurumurthy et al., 2002 | AF390676 |
| 203 | IND 10/91  | India | 1991 | Bovine  | Gurumurthy et al., 2002 | AF390674 |
| 204 | IND 13/91  | India | 1991 | Ovine   | Gurumurthy et al., 2002 | AF390677 |
| 205 | IND 17/91  | India | 1991 | Bovine  | Gurumurthy et al., 2002 | AF390682 |
| 206 | IND 51/93  | India | 1993 | Bovine  | Gurumurthy et al., 2002 | AF392923 |
| 207 | IND 53/93  | India | 1993 | Bovine  | Gurumurthy et al., 2002 | AF390695 |
| 208 | IND 281/94 | India | 1994 | Mithun  | Gurumurthy et al., 2002 | AF392910 |
| 209 | IND 1/95   | India | 1995 | Bovine  | Gurumurthy et al., 2002 | AF390683 |
| 210 | IND 4/95   | India | 1995 | Bovine  | Gurumurthy et al., 2002 | AF390693 |
| 211 | IND 6/95   | India | 1995 | Bovine  | Gurumurthy et al., 2002 | AF390697 |
| 212 | IND 14/95  | India | 1995 | Bovine  | Gurumurthy et al., 2002 | AF390678 |
| 213 | IND 15/95  | India | 1995 | Bovine  | Gurumurthy et al., 2002 | AF390680 |
| 214 | IND 26/95  | India | 1995 | Bovine  | Gurumurthy et al., 2002 | AF390687 |
| 215 | IND 43/95  | India | 1995 | Bovine  | Gurumurthy et al., 2002 | AF392916 |
| 216 | IND 47/95  | India | 1995 | Bovine  | Gurumurthy et al., 2002 | AF392921 |
| 217 | IND 50/95  | India | 1995 | Buffalo | Gurumurthy et al., 2002 | AF390694 |
| 218 | IND 57/95  | India | 1995 | Bovine  | Gurumurthy et al., 2002 | AF390696 |
| 219 | IND 33/96  | India | 1996 | Bovine  | Gurumurthy et al., 2002 | AF390689 |
| 220 | IND 43/96  | India | 1996 | Bovine  | Gurumurthy et al., 2002 | AF390690 |
| 221 | IND 70/96  | India | 1996 | Bovine  | Gurumurthy et al., 2002 | AF390698 |

|     |            |       |      |         |                         |          |
|-----|------------|-------|------|---------|-------------------------|----------|
| 222 | IND 72/96  | India | 1996 | Bovine  | Gurumurthy et al., 2002 | AF390700 |
| 223 | IND 73/96  | India | 1996 | Bovine  | Gurumurthy et al., 2002 | AF390701 |
| 224 | IND 80/96  | India | 1996 | Bovine  | Gurumurthy et al., 2002 | AF390703 |
| 225 | IND 81/96  | India | 1996 | Bovine  | Gurumurthy et al., 2002 | AF390704 |
| 226 | IND 82/96  | India | 1996 | Bovine  | Gurumurthy et al., 2002 | AF390705 |
| 227 | IND 89/96  | India | 1996 | Buffalo | Gurumurthy et al., 2002 | AF390706 |
| 228 | IND 173/96 | India | 1996 | Buffalo | Gurumurthy et al., 2002 | AF390681 |
| 229 | IND 256/97 | India | 1997 | Bovine  | Gurumurthy et al., 2002 | AF392906 |
| 230 | IND 294/97 | India | 1997 | Bovine  | Gurumurthy et al., 2002 | AF392913 |
| 231 | IND 386/97 | India | 1997 | Bovine  | Gurumurthy et al., 2002 | AF392914 |
| 232 | IND 388/97 | India | 1997 | Bovine  | Gurumurthy et al., 2002 | AF392915 |
| 233 | IND 491/97 | India | 1997 | NK      | Gurumurthy et al., 2002 | AF392922 |
| 234 | IND 270/98 | India | 1998 | Bovine  | Gurumurthy et al., 2002 | AF392907 |
| 235 | IND 271/98 | India | 1998 | Bovine  | Gurumurthy et al., 2002 | AF392908 |
| 236 | IND 451/98 | India | 1998 | Buffalo | Gurumurthy et al., 2002 | AF392917 |
| 237 | IND 452/98 | India | 1998 | Bovine  | Gurumurthy et al., 2002 | AF392918 |
| 238 | IND 453/98 | India | 1998 | Buffalo | Gurumurthy et al., 2002 | AF392919 |
| 239 | IND 454/98 | India | 1998 | Buffalo | Gurumurthy et al., 2002 | AF392920 |
| 240 | IND 92/99  | India | 1999 | Bovine  | Gurumurthy et al., 2002 | AF392925 |
| 241 | IND 102/99 | India | 1999 | Buffalo | Gurumurthy et al., 2002 | AF392897 |
| 242 | IND 104/99 | India | 1999 | Buffalo | Gurumurthy et al., 2002 | AF392898 |
| 243 | IND 105/99 | India | 1999 | Bovine  | Gurumurthy et al., 2002 | AF392899 |
| 244 | IND 107/99 | India | 1999 | Bovine  | Gurumurthy et al., 2002 | AF392900 |
| 245 | IND 108/99 | India | 1999 | Bovine  | Gurumurthy et al., 2002 | AF392902 |

|     |               |             |      |         |                         |          |
|-----|---------------|-------------|------|---------|-------------------------|----------|
| 246 | IND 126/99    | India       | 1999 | Bovine  | Gurumurthy et al., 2002 | AF392903 |
| 247 | IND 196/99    | India       | 1999 | Bovine  | Gurumurthy et al., 2002 | AF392905 |
| 248 | IND 277/99    | India       | 1999 | Bovine  | Gurumurthy et al., 2002 | AF392909 |
| 249 | IND 286/99    | India       | 1999 | Bovine  | Gurumurthy et al., 2002 | AF392911 |
| 250 | IND/18/80     | India       | 1980 | Bovine  | Valarcher et al., 2005  | DQ121116 |
| 251 | AFG/1/2001    | Afghanistan | 2001 | Bovine  | Valarcher et al., 2005  | DQ121109 |
| 252 | AFG/4/2001    | Afghanistan | 2001 | Bovine  | Valarcher et al., 2005  | DQ121110 |
| 253 | BHU/27/2002   | Bhutan      | 2002 | NK      | Valarcher et al., 2005  | DQ121111 |
| 254 | BHU/34/2002   | Bhutan      | 2002 | NK      | Valarcher et al., 2005  | DQ121112 |
| 255 | GRE/2/2000    | Greece      | 2000 | NK      | Valarcher et al., 2005  | DQ121113 |
| 256 | IND/15/81     | India       | 1981 | Bovine  | Valarcher et al., 2005  | DQ121117 |
| 257 | IND 60/02     | India       | 2002 | Bovine  | Valarcher et al., 2005  | DQ101243 |
| 258 | IND 139/02    | India       | 2002 | Bovine  | Valarcher et al., 2005  | DQ101242 |
| 259 | IND 198/02    | India       | 2002 | Bovine  | Valarcher et al., 2005  | DQ101244 |
| 260 | IRN/58/99     | India       | 1999 | NK      | Valarcher et al., 2005  | DQ121122 |
| 261 | IRN/4/2001    | India       | 2001 | Bovine  | Valarcher et al., 2005  | DQ121118 |
| 262 | MYA/2/2001    | Myanmar     | 2001 | Bovine  | Valarcher et al., 2005  | DQ121123 |
| 263 | PAK/30/2002   | Pakistan    | 2002 | Buffalo | Valarcher et al., 2005  | DQ121124 |
| 264 | PAK/31/2002   | Pakistan    | 2002 | Buffalo | Valarcher et al., 2005  | DQ121125 |
| 265 | TAI/1/98      | Thailand    | 1998 | Buffalo | Valarcher et al., 2005  | DQ121129 |
| 266 | TUR/8/99      | Turkey      | 1999 | Bovine  | Valarcher et al., 2005  | DQ121130 |
| 267 | TUR/10/99     | Turkey      | 1999 | Bovine  | Valarcher et al., 2005  | DQ121131 |
| 268 | As1/Shamir/89 | Israel      | 1989 | NK      | Lee et al., unpub. data | JF739177 |
| 269 | GRE/1/84      | Greece      | 1984 | Bovine  | Valarcher et al., 2008  | EU553909 |

|     |            |          |      |         |                            |          |
|-----|------------|----------|------|---------|----------------------------|----------|
| 270 | IND/8/79   | India    | 1979 | NK      | Valarcher et al,. 2008     | EU553910 |
| 271 | WBN/117/85 | India    | 1985 | NK      | Valarcher et al,. 2008     | EU553911 |
| 272 | IRN/1/73   | Iran     | 1973 | NK      | Valarcher et al,. 2008     | EU553912 |
| 273 | ISR/1/57   | Israel   | 1957 | NK      | Valarcher et al,. 2008     | EU553913 |
| 274 | PAK/2/98   | Pakistan | 1998 | Bovine  | Valarcher et al,. 2008     | EU553914 |
| 275 | TUR/15/73  | Turkey   | 1973 | Bovine  | Valarcher et al,. 2008     | EU553917 |
| 276 | TUR/3/2000 | Turkey   | 2000 | Bovine  | Valarcher et al,. 2008     | EU553915 |
| 277 | TUR/6/2000 | Turkey   | 2000 | Bovine  | Valarcher et al,. 2008     | EU553916 |
| 278 | IND 68/92  | India    | 1992 | Bovine  | Sanyal et al., unpub. Data | AF392946 |
| 279 | IND 247/92 | India    | 1992 | Bovine  | Sanyal et al., unpub. Data | AF392932 |
| 280 | IND 49/93  | India    | 1993 | Buffalo | Sanyal et al.,2004         | AF392945 |
| 281 | IND 152/94 | India    | 1994 | Bovine  | Sanyal et al.,2004         | AF392930 |
| 282 | IND 175/94 | India    | 1994 | Bovine  | Sanyal et al.,2004         | AF392931 |
| 283 | IND 305/94 | India    | 1994 | Bovine  | Sanyal et al.,2004         | AF392936 |
| 284 | IND 298/94 | India    | 1994 | Bovine  | Sanyal et al.,2004         | AF392935 |
| 285 | IND 24/95  | India    | 1995 | Bovine  | Sanyal et al.,2004         | AF392933 |
| 286 | IND 339/96 | India    | 1996 | Bovine  | Sanyal et al.,2004         | AF392939 |
| 287 | IND 390/97 | India    | 1997 | Bovine  | Sanyal et al.,2004         | AF392940 |
| 288 | IND 396/97 | India    | 1997 | Bovine  | Sanyal et al.,2004         | AF392941 |
| 289 | IND 397/97 | India    | 1997 | Bovine  | Sanyal et al.,2004         | AF392942 |
| 290 | IND 44/98  | India    | 1998 | Bovine  | Sanyal et al.,2004         | AF392943 |
| 291 | IND 125/98 | India    | 1998 | Bovine  | Sanyal et al.,2004         | AF392928 |
| 292 | IND 69/99  | India    | 1999 | Bovine  | Sanyal et al.,2004         | AF392947 |
| 293 | IND 127/99 | India    | 1999 | Bovine  | Sanyal et al.,2004         | AF392929 |

|     |            |       |      |         |                    |          |
|-----|------------|-------|------|---------|--------------------|----------|
| 294 | IND 278/99 | India | 1999 | Bovine  | Sanyal et al.,2004 | AF392934 |
| 295 | IND 46/93  | India | 1993 | Bovine  | Sanyal et al.,2004 | GQ220851 |
| 296 | IND 36/95  | India | 1995 | Bovine  | Sanyal et al.,2004 | GQ220852 |
| 297 | IND 192/99 | India | 1999 | Bovine  | Sanyal et al.,2004 | GQ220853 |
| 298 | IND 235/99 | India | 1999 | Buffalo | Sanyal et al.,2004 | GQ220854 |
| 299 | IND 367/00 | India | 2000 | Bovine  | Sanyal et al.,2004 | GQ220855 |
| 300 | IND 374/00 | India | 2000 | Bovine  | Sanyal et al.,2004 | GQ220856 |
| 301 | IND 377/00 | India | 2000 | Bovine  | Sanyal et al.,2004 | GQ220857 |
| 302 | IND 378/00 | India | 2000 | Bovine  | Sanyal et al.,2004 | GQ220858 |
| 303 | IND 379/00 | India | 2000 | Bovine  | Sanyal et al.,2004 | GQ220859 |
| 304 | IND 383/00 | India | 2000 | Bovine  | Sanyal et al.,2004 | GQ220860 |
| 305 | IND 384/00 | India | 2000 | Bovine  | Sanyal et al.,2004 | GQ220861 |
| 306 | IND 387/00 | India | 2000 | Bovine  | Sanyal et al.,2004 | GQ220862 |
| 307 | IND 51/01  | India | 2001 | Bovine  | Sanyal et al.,2004 | GQ220863 |
| 308 | IND 52/01  | India | 2001 | Bovine  | Sanyal et al.,2004 | GQ220864 |
| 309 | IND 107/01 | India | 2001 | Bovine  | Sanyal et al.,2004 | GQ220865 |
| 310 | IND 140/01 | India | 2001 | Bovine  | Sanyal et al.,2004 | GQ220866 |
| 311 | IND 148/01 | India | 2001 | Bovine  | Sanyal et al.,2004 | GQ220867 |
| 312 | IND 149/01 | India | 2001 | Bovine  | Sanyal et al.,2004 | GQ220868 |
| 313 | IND 152/01 | India | 2001 | Bovine  | Sanyal et al.,2004 | GQ220869 |
| 314 | IND 160/01 | India | 2001 | Bovine  | Sanyal et al.,2004 | GQ220870 |
| 315 | IND 248/01 | India | 2001 | Bovine  | Sanyal et al.,2004 | GQ220871 |
| 316 | IND 335/01 | India | 2001 | Bovine  | Sanyal et al.,2004 | GQ220872 |
| 317 | IND 342/01 | India | 2001 | Bovine  | Sanyal et al.,2004 | GQ220873 |

|     |                 |          |      |          |                           |          |
|-----|-----------------|----------|------|----------|---------------------------|----------|
| 318 | IND 354/01      | India    | 2001 | Bovine   | Sanyal et al.,2004        | GQ220874 |
| 319 | IND 373/01      | India    | 2001 | Bovine   | Sanyal et al.,2004        | GQ220875 |
| 320 | IND 387/01      | India    | 2001 | Bovine   | Sanyal et al.,2004        | GQ220876 |
| 321 | IND 388/01      | India    | 2001 | Bovine   | Sanyal et al.,2004        | GQ220877 |
| 322 | IND 389/01      | India    | 2001 | Bovine   | Sanyal et al.,2004        | GQ220878 |
| 323 | IND 396/01      | India    | 2001 | Bovine   | Sanyal et al.,2004        | GQ220879 |
| 324 | IND 397/01      | India    | 2001 | Bovine   | Sanyal et al.,2004        | GQ220880 |
| 325 | IND 423/01      | India    | 2001 | Bovine   | Sanyal et al.,2004        | GQ220881 |
| 326 | IND 438/01      | India    | 2001 | Bovine   | Sanyal et al.,2004        | GQ220882 |
| 327 | IND 61/02       | India    | 2002 | Bovine   | Sanyal et al.,2004        | GQ220883 |
| 328 | Kimron/ISR/57   | Israel   | 1957 | NK       | Carrillo et al., 2005     | AY593797 |
| 329 | ISR/3/63        | Israel   | 1963 | NK       | Carrillo et al., 2005     | AY593796 |
| 330 | LEB/84          | Lebanon  | 1984 | Bovine   | Carrillo et al., 2005     | AY593799 |
| 331 | PAK/1/54        | Pakistan | 1954 | Buffalo  | Carrillo et al., 2005     | AY593795 |
| 332 | YNBS/58         | China    | 1958 | NK       | Chang et al., unpub. Data | AY390432 |
| 333 | ZB/CHA/58       | China    | 1958 | NK       | Xin et al., 2009          | DQ533483 |
| 334 | asia1leb83      | Lebanon  | 1983 | NK       | Carrillo et al., 2005     | AY593800 |
| 335 | asia1leb-89     | Lebanon  | 1989 | NK       | Carrillo et al., 2005     | AY593798 |
| 336 | IND_321/01      | India    | 2002 | cattle   | Sanyal et al.,2004        | AY687333 |
| 337 | asia1-2isrl3-63 | Israel   | 1963 | NK       | Carrillo et al., 2005     | AY593796 |
| 338 | LAO/1/96        | Laos     | 1996 | NK       | Khounsy et al., 2009      | EU667460 |
| 339 | LAO/3/98        | Laos     | 1998 | Bovine   | Khounsy et al., 2009      | EU667461 |
| 340 | IND 81/86       | India    | 1986 | Bovine   | Mohapatra et al., 2008    | DQ989306 |
| 341 | IND 52/87       | India    | 1986 | Bubaline | Mohapatra et al., 2008    | DQ989313 |



|     |                           |             |      |          |                         |          |
|-----|---------------------------|-------------|------|----------|-------------------------|----------|
| 342 | IND 21/89                 | India       | 1989 | Bubaline | Mohapatra et al., 2008  | DQ989316 |
| 343 | IND 116/90                | India       | 1990 | Bovine   | Mohapatra et al., 2008  | DQ989305 |
| 344 | IND 13/91                 | India       | 1991 | Ovine    | Mohapatra et al., 2008  | DQ989312 |
| 345 | IND 247/92                | India       | 1992 | Bovine   | Mohapatra et al., 2008  | DQ989307 |
| 346 | IND 47/93                 | India       | 1993 | Bovine   | Mohapatra et al., 2008  | DQ989315 |
| 347 | IND 151/94                | India       | 1994 | Bovine   | Mohapatra et al., 2008  | DQ989303 |
| 348 | IND 82/96                 | India       | 1996 | Bovine   | Mohapatra et al., 2008  | DQ989309 |
| 349 | IND_397-97                | India       | 1997 | Bovine   | Mohapatra et al., 2008  | DQ989308 |
| 350 | IND 101/99                | India       | 1999 | Bovine   | Mohapatra et al., 2008  | DQ989310 |
| 351 | IND 334/00                | India       | 2000 | Bovine   | Mohapatra et al., 2008  | DQ989304 |
| 352 | IND 148/01                | India       | 2001 | Bovine   | Mohapatra et al., 2008  | DQ989317 |
| 353 | IND 354/01                | India       | 2001 | Bovine   | Mohapatra et al., 2008  | DQ989314 |
| 354 | IND 423/01                | India       | 2001 | Bovine   | Mohapatra et al., 2008  | DQ989319 |
| 355 | IND 438/01                | India       | 2001 | Bovine   | Mohapatra et al., 2008  | DQ989321 |
| 356 | IND 37/02                 | India       | 2002 | Bubaline | Mohapatra et al., 2008  | DQ989311 |
| 357 | IND 61/02                 | India       | 2002 | Bovine   | Mohapatra et al., 2008  | DQ989318 |
| 358 | IND 139/02                | India       | 2002 | Bovine   | Mohapatra et al., 2008  | DQ989322 |
| 359 | IND 182/02                | India       | 2002 | Bovine   | Mohapatra et al., 2008  | DQ989320 |
| 360 | IND68/2012                | India       | 2012 | cattle   | Subramaniam et al.,2013 | KF570667 |
| 361 | As/SIN/PAK/L281<br>2/2009 | Pakistan    | 2009 | Buffalo  | Jamal et al., 2011      | JN006721 |
| 362 | As/SIN/PAK/L281<br>0/2009 | Pakistan    | 2009 | Buffalo  | Jamal et al., 2011      | JN006720 |
| 363 | HKN_1/2005                | Hong Kong   | 2005 | NK       | Xu et al., unpub. Data  | HQ268512 |
| 364 | As/KAB/AFG/L64            | Afghanistan | 2009 | cattle   | Jamal et al., 2011      | HQ439202 |

|     |                        |          |      |         |                             |          |
|-----|------------------------|----------|------|---------|-----------------------------|----------|
|     | 2/009                  |          |      |         |                             |          |
| 365 | As/SIN/PAK/L5/2<br>008 | Pakistan | 2008 | Buffalo | Jamal et al., 2011          | JN006719 |
| 366 | MAY/9/99               | Malaysia | 1999 | cattle  | Abdul-Hamid et al.,2011     | HQ632774 |
| 367 | Asia1/YS/CHA/05        | China    | 2005 | Bovine  | Wang et al., 2011           | GU931682 |
| 368 | Nepal 29/97            | Nepal    | 1997 | NK      | Brocchi et al., unpub. Data | EF134952 |
| 369 | IND_97-03              | India    | 2003 | cattle  | Mohapatra et al., 2008      | DQ989323 |
| 370 | TUR/1094/07/00         | Turkey   | 2000 | NK      | Klein et al., 2006          | DQ296529 |
| 371 | IND/71/96              | India    | 1996 | cattle  | Gurumurthy et al., 2002     | AF390699 |
| 372 | IND/316/94             | India    | 1994 | cattle  | Gurumurthy et al., 2002     | AF390688 |
| 373 | IND/155/88             | India    | 1988 | cattle  | Gurumurthy et al., 2002     | AF390679 |
| 374 | IND_141/02             | India    | 2002 | cattle  | Sanyal et al.,2004          | GQ220884 |
| 375 | Asia1/IND/324/9<br>8   | India    | 1998 | Buffalo | Sanyal et al.,2004          | AF392938 |
| 376 | Asia1/IND/314/9<br>4   | India    | 1994 | cattle  | Sanyal et al.,2004          | AF392937 |
| 377 | Asia1/IND/120/9<br>1   | India    | 1991 | cattle  | Sanyal et al.,2004          | AF392927 |
